# Supplementary material for: Pollinator probing preference and switching mode-mediated self-interference within a monoecious plant significantly reduced reproductive fitness
Source: Frontiers journal article supplement (doi:10.3389/fpls.2023.1243764), 2023-10-10
Supplement: Table_1.XLS [file Table_1.XLS]

## Sheet: flower number
population	sex	number
LY	2	32
LY	2	25
LY	2	13
LY	2	30
LY	2	30
LY	2	30
LY	2	39
LY	1	23
LY	1	28
LY	2	25
LY	2	25
LY	2	25
LY	2	38
LY	2	23
LY	1	30
LY	2	26
LY	2	17
LY	2	27
LY	2	32
LY	2	21
LY	1	36
LY	2	29
LY	2	28
LY	2	30
LY	2	23
LY	2	23
LY	2	34
LY	2	26
LY	2	29
LY	2	29
LY	2	25
LY	2	38
LY	2	31
LY	2	33
LY	2	28
LY	2	22
LY	2	19
LY	2	31
LY	2	29
LY	2	26
LY	1	37
LY	1	24
LY	1	33
LY	2	25
LY	2	25
LY	2	26
LY	2	20
LY	2	23
LY	2	31
LY	2	28
LY	2	29
LY	2	26
LY	2	32
LY	1	28
LY	2	18
LY	2	30
LY	2	28
LY	2	30
LY	2	26
LY	2	24
LY	2	28
LY	2	29
LY	2	33
LY	1	31
LY	2	26
LY	2	37
LY	2	24
LY	2	33
LY	1	26
LY	1	26
LY	2	23
LY	2	32
LY	2	27
LY	2	31
LY	2	29
LY	1	23
LY	1	35
LY	2	22
LY	1	25
LY	1	30
LY	2	31
LY	2	23
LY	1	32
LY	2	25
LY	1	27
LY	2	27
LY	1	17
LY	2	27
LY	1	26
LY	2	27
LY	2	29
LY	2	24
LY	2	27
LY	2	21
LY	2	29
LY	1	34
LY	2	33
LY	2	27
LY	2	29
LY	1	36
LY	2	22
LY	1	32
CZ	2	37
CZ	2	35
CZ	2	40
CZ	2	50
CZ	2	37
CZ	2	52
CZ	2	39
CZ	2	30
CZ	2	36
CZ	2	35
CZ	2	31
CZ	2	36
CZ	2	51
CZ	2	40
CZ	2	34
CZ	2	46
CZ	2	52
CZ	2	41
CZ	2	45
CZ	2	35
CZ	2	44
CZ	2	36
CZ	2	33
CZ	2	38
CZ	2	34
CZ	2	36
CZ	2	26
CZ	2	38
CZ	2	40
CZ	2	26
CZ	1	46
CZ	2	48
CZ	2	38
CZ	2	36
CZ	2	38
CZ	2	36
CZ	2	43
CZ	2	39
CZ	2	50
CZ	2	41
CZ	2	27
CZ	2	37
CZ	2	32
CZ	2	31
CZ	2	39
CZ	2	47
CZ	2	37
CZ	1	31
CZ	2	49
CZ	2	62
CZ	2	43
CZ	2	43
CZ	1	38
CZ	2	41
CZ	2	39
CZ	2	39
CZ	2	32
CZ	2	31
CZ	2	39
CZ	2	28
CZ	2	36
CZ	2	39
CZ	2	22
CZ	1	45
CZ	2	44
CZ	2	42
CZ	2	30
CZ	2	39
CZ	2	35
CZ	2	42
CZ	2	35
CZ	2	45
CZ	2	40
CZ	2	30
CZ	2	33
CZ	2	36
CZ	2	33
CZ	2	38
CZ	2	47
CZ	2	40
CZ	2	40
CZ	1	52
CZ	2	58
CZ	2	38
CZ	2	45
CZ	2	27
CZ	2	36
CZ	2	31
CZ	2	35
CZ	2	36
CZ	2	34
CZ	2	31
CZ	2	32
CZ	1	28
CZ	2	40
CZ	2	32
CZ	1	42
CZ	1	35
CZ	2	41

## Sheet: flower size
population	sex	size
LY	female	16.23
LY	female	17.105
LY	female	10.755
LY	female	22.175
LY	female	20.225
LY	female	15.6
LY	female	22.105
LY	female	19.055
LY	female	15.54
LY	female	27.505
LY	female	21.58
LY	female	17.05
LY	female	21.715
LY	female	14.5
LY	female	15.28
LY	female	15.99
LY	female	19.01
LY	female	15.295
LY	female	17.535
LY	female	22.415
LY	female	16.925
LY	female	20.68
LY	female	17.47
LY	female	0
LY	female	21.925
LY	female	12.645
LY	female	11.325
LY	female	25.875
LY	female	30.28
LY	female	21.93
LY	female	19.015
LY	female	14.88
LY	female	15.28
LY	female	16.58
LY	female	18.765
LY	female	10.97
LY	female	15.43
LY	female	18.625
LY	female	14.45
LY	female	14.445
LY	female	8.085
LY	female	0
LY	female	14.67
LY	female	12.785
LY	female	10.165
LY	female	21.145
LY	female	20.735
LY	female	14.025
LY	female	16.87
LY	female	11.315
LY	female	7.47
LY	female	17.595
LY	female	11.255
LY	female	0
LY	female	18.36
LY	female	13.505
LY	female	11.195
LY	female	12.245
LY	female	21.405
LY	female	9.995
LY	female	16.27
LY	female	17.06
LY	female	10.36
LY	female	15.595
LY	female	14.475
LY	female	0
LY	female	13.08
LY	female	11.91
LY	female	8.475
LY	female	19.185
LY	female	12.405
LY	female	15.545
LY	female	21.52
LY	female	17.685
LY	female	15.385
LY	female	20.825
LY	female	18.15
LY	female	0
LY	female	13.55
LY	female	10.965
LY	female	11.7
LY	female	13.01
LY	female	15.945
LY	female	8.29
LY	female	22.28
LY	female	23.765
LY	female	10.93
LY	female	18.705
LY	female	16.65
LY	female	13.855
LY	male	5.395
LY	male	5.27
LY	male	4.58
LY	male	3.795
LY	male	3.59
LY	male	4.38
LY	male	3.6
LY	male	4.125
LY	male	3.79
LY	male	4.19
LY	male	4.26
LY	male	3.385
LY	male	3.835
LY	male	3.22
LY	male	3.115
LY	male	4.17
LY	male	3.51
LY	male	3.29
LY	male	3.76
LY	male	3.775
LY	male	3.64
LY	male	4.265
LY	male	3.97
LY	male	4.085
LY	male	4.015
LY	male	3.635
LY	male	4
LY	male	3.76
LY	male	4.445
LY	male	4.545
LY	male	4.395
LY	male	3.905
LY	male	3.785
LY	male	3.825
LY	male	4.245
LY	male	4.585
LY	male	3.535
LY	male	3.985
LY	male	3.58
LY	male	3.6
LY	male	3.265
LY	male	3.68
LY	male	3.445
LY	male	4.55
LY	male	4
LY	male	3.245
LY	male	4.31
LY	male	3.3
LY	male	3.915
LY	male	4.22
LY	male	3.95
LY	male	3.085
LY	male	3.29
LY	male	2.33
LY	male	3.935
LY	male	4.15
LY	male	3.09
LY	male	2.985
LY	male	3.095
LY	male	2.94
LY	male	3.455
LY	male	3.435
LY	male	3.275
LY	male	3.415
LY	male	3.595
LY	male	3.22
LY	male	4.015
LY	male	4.105
LY	male	4.015
LY	male	3.65
LY	male	3.795
LY	male	3.34
LY	male	3.76
LY	male	3.395
LY	male	3.22
LY	male	3.46
LY	male	2.71
LY	male	3.725
LY	male	3.51
LY	male	3.345
LY	male	3.225
LY	male	4.19
LY	male	4.215
LY	male	3.28
LY	male	3.235
LY	male	3.15
LY	male	3.48
LY	male	3.95
LY	male	4.18
LY	male	3.77
CZ	female	19.54
CZ	female	11.82
CZ	female	22.56
CZ	female	24.44
CZ	female	22.44
CZ	female	23.36
CZ	female	14.76
CZ	female	25.14
CZ	female	25.8
CZ	female	6.08
CZ	female	9.53
CZ	female	12.17
CZ	female	17.11
CZ	female	20.94
CZ	female	30.92
CZ	female	20.84
CZ	female	16.89
CZ	female	18.05
CZ	female	12.57
CZ	female	11.17
CZ	female	23.49
CZ	female	17.51
CZ	female	12.81
CZ	female	21.04
CZ	female	19.42
CZ	female	16.93
CZ	female	15.7
CZ	female	12.77
CZ	female	12.38
CZ	female	15.66
CZ	female	19.64
CZ	female	12.52
CZ	female	15.23
CZ	female	20.91
CZ	female	21.3
CZ	female	20.23
CZ	female	17.28
CZ	female	22.98
CZ	female	16.97
CZ	female	28.67
CZ	female	30.19
CZ	female	7.93
CZ	female	8.22
CZ	female	18.39
CZ	female	18.18
CZ	female	20.4
CZ	female	10.42
CZ	female	24.38
CZ	female	24.64
CZ	female	16.6
CZ	female	23.42
CZ	female	23.57
CZ	female	12.63
CZ	female	18.12
CZ	female	15.94
CZ	female	20.24
CZ	female	33.09
CZ	female	19.58
CZ	female	25.05
CZ	female	10.74
CZ	female	19.25
CZ	female	20.36
CZ	female	12.41
CZ	female	18.78
CZ	female	6.2
CZ	female	12.64
CZ	female	9.89
CZ	female	20.79
CZ	female	15.38
CZ	female	9.66
CZ	female	13.66
CZ	female	14.18
CZ	female	15.05
CZ	female	10.73
CZ	female	10.47
CZ	female	15.25
CZ	female	14.79
CZ	female	15.41
CZ	female	15.69
CZ	female	23.9
CZ	female	9.68
CZ	female	15.5
CZ	female	16.34
CZ	female	18.29
CZ	female	8.61
CZ	female	16.79
CZ	female	14
CZ	female	18.13
CZ	female	29.39
CZ	female	14.75
CZ	female	16.78
CZ	female	12.56
CZ	female	15.65
CZ	female	10.54
CZ	female	14.15
CZ	female	10.13
CZ	male	5.63
CZ	male	5.69
CZ	male	4.58
CZ	male	5.36
CZ	male	7.75
CZ	male	6.82
CZ	male	5.07
CZ	male	6.33
CZ	male	6.25
CZ	male	2.88
CZ	male	4
CZ	male	5.05
CZ	male	4.66
CZ	male	5.14
CZ	male	4.82
CZ	male	6.33
CZ	male	5.65
CZ	male	4.97
CZ	male	5.02
CZ	male	3.59
CZ	male	5.25
CZ	male	5.8
CZ	male	4.25
CZ	male	4.5
CZ	male	6.38
CZ	male	4.61
CZ	male	5.82
CZ	male	5.07
CZ	male	4.01
CZ	male	5.68
CZ	male	6.2
CZ	male	3.37
CZ	male	4.81
CZ	male	5.7
CZ	male	4.78
CZ	male	5.24
CZ	male	5.39
CZ	male	7.63
CZ	male	6.46
CZ	male	6.56
CZ	male	6.01
CZ	male	3.37
CZ	male	3.35
CZ	male	4.77
CZ	male	5.73
CZ	male	5.07
CZ	male	4.16
CZ	male	6.39
CZ	male	5.62
CZ	male	5.08
CZ	male	5.33
CZ	male	5.63
CZ	male	3.46
CZ	male	4.6
CZ	male	4.9
CZ	male	5.06
CZ	male	5.67
CZ	male	4.62
CZ	male	5.87
CZ	male	5.59
CZ	male	5.66
CZ	male	5.93
CZ	male	4.77
CZ	male	5.2
CZ	male	3.6
CZ	male	4.75
CZ	male	2.91
CZ	male	4.35
CZ	male	6.51
CZ	male	4.54
CZ	male	5.5
CZ	male	4.64
CZ	male	5.09
CZ	male	3.89
CZ	male	4.7
CZ	male	4.97
CZ	male	5.44
CZ	male	5
CZ	male	4.41
CZ	male	6.72
CZ	male	5.3
CZ	male	4.27
CZ	male	4.23
CZ	male	4.5
CZ	male	3.46
CZ	male	5.2
CZ	male	4.31
CZ	male	4.9
CZ	male	4.39
CZ	male	3.8
CZ	male	5.08
CZ	male	5.29
CZ	male	5.5
CZ	male	5.12
CZ	male	4.39
CZ	male	3.86

## Sheet: flower weight
population	sex	weight
LY	female	0.013
LY	female	0.0166
LY	female	0.0208
LY	female	0.0113
LY	female	0.0137
LY	female	0.0043
LY	female	0.0087
LY	female	0.0038
LY	female	0.0069
LY	female	0.0076
LY	female	0.0046
LY	female	0.0163
LY	female	0.0071
LY	female	0.0028
LY	female	0.0054
LY	female	0.0048
LY	female	0.0043
LY	female	0.005
LY	female	0.0066
LY	female	0.0031
LY	female	0.0092
LY	female	0.0071
LY	female	0.012
LY	female	0.0043
LY	female	0.0147
LY	female	0.0083
LY	female	0.0046
LY	female	0.0077
LY	female	0.0093
LY	female	0.0103
LY	female	0.0122
LY	female	0.009
LY	female	0.0093
LY	female	0.0145
LY	female	0.0169
LY	female	0.0116
LY	female	0.0043
LY	female	0.0071
LY	female	0.0057
LY	male	0.0017
LY	male	0.00172
LY	male	0.00216
LY	male	0.00092
LY	male	0.00162
LY	male	0.0023
LY	male	0.0026
LY	male	0.0015
LY	male	0.0011
LY	male	0.00136
LY	male	0.0015
LY	male	0.00162
LY	male	0.00196
LY	male	0.0016
LY	male	0.00102
LY	male	0.00216
LY	male	0.00148
LY	male	0.00066
LY	male	0.00122
LY	male	0.00116
LY	male	0.00128
LY	male	0.00176
LY	male	0.00168
LY	male	0.0015
LY	male	0.00178
LY	male	0.00192
LY	male	0.00146
LY	male	0.00182
LY	male	0.00112
LY	male	0.00152
LY	male	0.00204
LY	male	0.0019
LY	male	0.00182
LY	male	0.0013
LY	male	0.00196
LY	male	0.00176
LY	male	0.00156
LY	male	0.00046
LY	male	0.00106
CZ	female	0.00232
CZ	female	0.0167
CZ	female	0.0204
CZ	female	0.0202
CZ	female	0.0888
CZ	female	0.0163
CZ	female	0.0214
CZ	female	0.0224
CZ	female	0.0148
CZ	female	0.0336
CZ	female	0.0216
CZ	female	0.0117
CZ	female	0.015
CZ	female	0.0096
CZ	female	0.0094
CZ	female	0.0156
CZ	female	0.0171
CZ	female	0.0077
CZ	female	0.0128
CZ	female	0.0069
CZ	female	0.0087
CZ	female	0.0022
CZ	female	0.006
CZ	female	0.0093
CZ	female	0.0097
CZ	female	0.0081
CZ	female	0.0138
CZ	female	0.0103
CZ	female	0.0332
CZ	female	0.0446
CZ	female	0.015
CZ	female	0.0173
CZ	female	0.0287
CZ	female	0.0069
CZ	female	0.0129
CZ	female	0.0209
CZ	female	0.0089
CZ	female	0.0101
CZ	male	0.0135
CZ	male	0.00392
CZ	male	0.00398
CZ	male	0.00278
CZ	male	0.00288
CZ	male	0.00326
CZ	male	0.00418
CZ	male	0.00204
CZ	male	0.00402
CZ	male	0.00318
CZ	male	0.00162
CZ	male	0.00276
CZ	male	0.0026
CZ	male	0.00156
CZ	male	0.0033
CZ	male	0.00354
CZ	male	0.00326
CZ	male	0.00198
CZ	male	0.00282
CZ	male	0.00194
CZ	male	0.0017
CZ	male	0.00184
CZ	male	0.00216
CZ	male	0.00192
CZ	male	0.00192
CZ	male	0.0025
CZ	male	0.00268
CZ	male	0.0043
CZ	male	0.00438
CZ	male	0.034
CZ	male	0.00218
CZ	male	0.00508
CZ	male	0.00472
CZ	male	0.00372
CZ	male	0.00358
CZ	male	0.00282
CZ	male	0.00456

## Sheet: self-compatibility
population	treNaturaltment	fruit set	weight
CZ	Natural	0	0
CZ	Natural	0.25	30.12
CZ	Natural	0	0
CZ	Natural	0.25	25.27
CZ	Natural	0.25	45.22
CZ	Natural	0.25	33.08
CZ	Natural	0.166667	37.88
CZ	Natural	0.25	23.07
CZ	Natural	0.25	40.35
CZ	Natural	0.25	33.28
CZ	Natural	0.125	46.12
CZ	Natural	0	0
CZ	Natural	0	0
CZ	Natural	0.5	22.68
CZ	Natural	0	0
CZ	Natural	0	0
CZ	Natural	0.166667	25.56
CZ	Natural	0.25	33.68
CZ	Natural	0.166667	31.35
CZ	Natural	0.166667	26.68
CZ	Natural	0	0
CZ	Natural	0.166667	41.22
CZ	Natural	0.25	40.28
CZ	Natural	0.5	33.36
CZ	Natural	0	0
CZ	Natural	0.25	35.64
CZ	Natural	0.4	32.17
CZ	Natural	0	0
CZ	Natural	0.333333	35.23
CZ	Natural	0.333333	25.66
CZ	Bagging	0	0
CZ	Bagging	0	0
CZ	Bagging	0	0
CZ	Bagging	0	0
CZ	Bagging	0	0
CZ	Bagging	0	0
CZ	Bagging	0	0
CZ	Bagging	0	0
CZ	Bagging	0	0
CZ	Bagging	0	0
CZ	Bagging	0	0
CZ	Bagging	0	0
CZ	Bagging	0	0
CZ	Bagging	0	0
CZ	Bagging	0	0
CZ	Bagging	0	0
CZ	Bagging	0	0
CZ	Bagging	0	0
CZ	Bagging	0	0
CZ	Bagging	0	0
CZ	Bagging	0	0
CZ	Bagging	0	0
CZ	Bagging	0	0
CZ	Bagging	0	0
CZ	Bagging	0	0
CZ	Bagging	0	0
CZ	Bagging	0	0
CZ	Bagging	0	0
CZ	Bagging	0	0
CZ	Bagging	0	0
CZ	Netting	0	0
CZ	Netting	0	0
CZ	Netting	0	0
CZ	Netting	0	0
CZ	Netting	0	0
CZ	Netting	0	0
CZ	Netting	0	0
CZ	Netting	0	0
CZ	Netting	0	0
CZ	Netting	0	0
CZ	Netting	0	0
CZ	Netting	0	0
CZ	Netting	0	0
CZ	Netting	0	0
CZ	Netting	0	0
CZ	Netting	0	0
CZ	Netting	0	0
CZ	Netting	0	0
CZ	Netting	0	0
CZ	Netting	0	0
CZ	Netting	0	0
CZ	Netting	0	0
CZ	Netting	0	0
CZ	Netting	0	0
CZ	Netting	0	0
CZ	Netting	0	0
CZ	Netting	0	0
CZ	Netting	0	0
CZ	Netting	0	0
CZ	Netting	0	0
CZ	Selfing	0	0
CZ	Selfing	0	0
CZ	Selfing	0	0
CZ	Selfing	0	0
CZ	Selfing	0	0
CZ	Selfing	0	0
CZ	Selfing	0	0
CZ	Selfing	0	0
CZ	Selfing	0	0
CZ	Selfing	0	0
CZ	Selfing	0	0
CZ	Selfing	0	0
CZ	Selfing	0	0
CZ	Selfing	0	0
CZ	Selfing	0	0
CZ	Selfing	0	0
CZ	Selfing	0	0
CZ	Selfing	0	0
CZ	Selfing	0	0
CZ	Selfing	0	0
CZ	Selfing	0	0
CZ	Selfing	0	0
CZ	Selfing	0	0
CZ	Selfing	0	0
CZ	Selfing	0	0
CZ	Selfing	0	0
CZ	Selfing	0	0
CZ	Selfing	0	0
CZ	Selfing	0	0
CZ	Selfing	0	0
CZ	Hand-pollination	0	0
CZ	Hand-pollination	1	65.37
CZ	Hand-pollination	0.5	35.98
CZ	Hand-pollination	0	0
CZ	Hand-pollination	0.5	47.3
CZ	Hand-pollination	0	0
CZ	Hand-pollination	0	0
CZ	Hand-pollination	0.25	73.2
CZ	Hand-pollination	0.8	36.8
CZ	Hand-pollination	1	24.6
CZ	Hand-pollination	0	0
CZ	Hand-pollination	0.75	57.2
CZ	Hand-pollination	0.333333	55.6
CZ	Hand-pollination	0.25	48.6
CZ	Hand-pollination	0.571429	36.8
CZ	Hand-pollination	0.25	35.9
CZ	Hand-pollination	0.25	33.2
CZ	Hand-pollination	0.833333	36.2
CZ	Hand-pollination	0.75	78.2
CZ	Hand-pollination	0.25	41.8
CZ	Hand-pollination	0.4	50.3
CZ	Hand-pollination	0.5	68.2
CZ	Hand-pollination	1	46.6
CZ	Hand-pollination	0.4	87.5
CZ	Hand-pollination	0.25	42.5
CZ	Hand-pollination	0.25	67.2
CZ	Hand-pollination	0.5	35.8
CZ	Hand-pollination	0.333333	67.2
CZ	Hand-pollination	0.5	39.2
CZ	Hand-pollination	1	68.2
LY	Natural	0	0
LY	Natural	0	0
LY	Natural	0	0
LY	Natural	0	0
LY	Natural	0	0
LY	Natural	0	0
LY	Natural	0	0
LY	Natural	0.25	23.46
LY	Natural	0	0
LY	Natural	0	0
LY	Natural	0.25	21.85
LY	Natural	0	0
LY	Natural	0	0
LY	Natural	0.25	20.24
LY	Natural	0	0
LY	Natural	0	0
LY	Natural	0.25	16.33
LY	Natural	0	0
LY	Natural	0	0
LY	Natural	0	0
LY	Natural	0	0
LY	Natural	0	0
LY	Natural	0	0
LY	Natural	0	0
LY	Natural	0	0
LY	Natural	0	0
LY	Natural	0.166667	18.17
LY	Natural	0	0
LY	Natural	0	0
LY	Natural	0	0
LY	Bagging	0	0
LY	Bagging	0	0
LY	Bagging	0	0
LY	Bagging	0	0
LY	Bagging	0	0
LY	Bagging	0	0
LY	Bagging	0	0
LY	Bagging	0	0
LY	Bagging	0	0
LY	Bagging	0	0
LY	Bagging	0	0
LY	Bagging	0	0
LY	Bagging	0	0
LY	Bagging	0	0
LY	Bagging	0	0
LY	Bagging	0	0
LY	Bagging	0	0
LY	Bagging	0	0
LY	Bagging	0	0
LY	Bagging	0	0
LY	Bagging	0	0
LY	Bagging	0	0
LY	Bagging	0	0
LY	Bagging	0	0
LY	Bagging	0	0
LY	Bagging	0	0
LY	Bagging	0	0
LY	Bagging	0	0
LY	Bagging	0	0
LY	Bagging	0	0
LY	Netting	0	0
LY	Netting	0	0
LY	Netting	0	0
LY	Netting	0	0
LY	Netting	0	0
LY	Netting	0	0
LY	Netting	0	0
LY	Netting	0	0
LY	Netting	0	0
LY	Netting	0	0
LY	Netting	0	0
LY	Netting	0	0
LY	Netting	0	0
LY	Netting	0	0
LY	Netting	0	0
LY	Netting	0	0
LY	Netting	0	0
LY	Netting	0	0
LY	Netting	0	0
LY	Netting	0	0
LY	Netting	0	0
LY	Netting	0	0
LY	Netting	0	0
LY	Netting	0	0
LY	Netting	0	0
LY	Netting	0	0
LY	Netting	0	0
LY	Netting	0	0
LY	Netting	0	0
LY	Netting	0	0
LY	Selfing	0	0
LY	Selfing	0	0
LY	Selfing	0	0
LY	Selfing	0	0
LY	Selfing	0	0
LY	Selfing	0	0
LY	Selfing	0	0
LY	Selfing	0	0
LY	Selfing	0	0
LY	Selfing	0	0
LY	Selfing	0	0
LY	Selfing	0	0
LY	Selfing	0	0
LY	Selfing	0	0
LY	Selfing	0	0
LY	Selfing	0	0
LY	Selfing	0	0
LY	Selfing	0	0
LY	Selfing	0	0
LY	Selfing	0	0
LY	Selfing	0	0
LY	Selfing	0	0
LY	Selfing	0	0
LY	Selfing	0	0
LY	Selfing	0	0
LY	Selfing	0	0
LY	Selfing	0	0
LY	Selfing	0	0
LY	Selfing	0	0
LY	Selfing	0	0
LY	Hand-pollination	0	0
LY	Hand-pollination	1	39.1
LY	Hand-pollination	0.5	40.71
LY	Hand-pollination	0	0
LY	Hand-pollination	0.5	45.08
LY	Hand-pollination	0.333333	42.78
LY	Hand-pollination	0	0
LY	Hand-pollination	0	0
LY	Hand-pollination	0.5	47.84
LY	Hand-pollination	0.5	38.18
LY	Hand-pollination	0	0
LY	Hand-pollination	0.5	42.78
LY	Hand-pollination	0.333333	41.4
LY	Hand-pollination	0.25	38.64
LY	Hand-pollination	0.5	34.73
LY	Hand-pollination	0	0
LY	Hand-pollination	0.25	52.9
LY	Hand-pollination	0.333333	38.18
LY	Hand-pollination	0.75	31.97
LY	Hand-pollination	0.25	31.05
LY	Hand-pollination	0.25	48.76
LY	Hand-pollination	0.5	30.36
LY	Hand-pollination	0.5	58.65
LY	Hand-pollination	0.5	45.31
LY	Hand-pollination	0.25	50.83
LY	Hand-pollination	0	0
LY	Hand-pollination	0.5	26.68
LY	Hand-pollination	0	45.31
LY	Hand-pollination	0.5	50.14
LY	Hand-pollination	0.5	38.64

## Sheet: pollinator probing preference
treatment	female flower number	male flower number	bees number	to male flower	to female flower	total visited flower number	total visited male flower number	total visited female flower number
Natural	2	30	1	1	0	1	1	0
Natural	2	32	5	5	0	11	11	0
Natural	2	28	1	1	0	4	4	0
Natural	2	34	7	7	0	15	15	0
Natural	2	29	2	2	0	8	8	0
Natural	2	28	1	1	0	2	2	0
Natural	2	38	5	5	0	20	20	0
Natural	2	36	3	3	0	10	10	0
Natural	2	40	8	8	0	32	32	0
Natural	2	35	3	2	1	6	5	1
Natural	2	37	4	4	0	16	16	0
Natural	2	29	0	0	0	0	0	0
Natural	2	32	5	4	1	13	12	1
Natural	2	30	3	3	0	10	10	0
Natural	2	29	1	1	0	1	1	0
Natural	2	30	1	1	0	1	1	0
Natural	2	31	1	1	0	5	5	0
Natural	2	28	0	0	0	0	0	0
Natural	2	30	1	1	0	3	2	1
Natural	2	35	3	3	0	15	15	0
Natural	2	38	4	4	0	17	17	0
Natural	2	34	6	6	0	18	18	0
Natural	2	36	8	8	0	16	15	1
Natural	2	37	10	10	0	22	22	0
Natural	2	36	9	9	0	20	20	0
Natural	2	35	7	7	0	25	25	0
Natural	2	30	3	3	0	4	4	0
Natural	2	34	5	5	0	14	14	0
Natural	2	36	10	10	0	32	32	0
Natural	2	33	3	2	1	11	10	1
Natural	2	31	0	0	0	0	0	0
Natural	2	30	0	0	0	0	0	0
Natural	2	30	1	1	0	1	1	0
Natural	2	32	0	0	0	0	0	0
Natural	2	33	2	2	0	11	11	0
Natural	2	30	0	0	0	0	0	0
Natural	2	32	1	1	0	2	2	0
Natural	2	33	2	1	1	2	1	1
Natural	2	30	1	1	0	5	5	0
Natural	2	38	5	5	0	32	32	0
Natural	2	37	5	5	0	18	18	0
Natural	2	38	6	6	0	11	11	0
Natural	2	33	2	2	0	2	2	0
Natural	2	31	5	5	0	9	9	0
Natural	2	30	2	2	0	5	5	0
Natural	2	31	2	2	0	5	5	0
Natural	2	35	7	7	0	24	24	0
Natural	2	32	4	4	0	5	5	0
Natural	2	31	2	2	0	4	4	0
Natural	2	30	1	1	0	2	2	0
Natural	2	32	0	0	0	0	0	0
Natural	2	33	0	0	0	0	0	0
Natural	2	34	2	2	0	6	6	0
Natural	2	32	2	2	0	2	2	0
Natural	2	33	2	2	0	2	2	0
Natural	2	31	1	1	0	1	1	0
Natural	2	34	2	2	0	7	7	0
Natural	2	36	4	4	0	10	10	0
Natural	2	34	3	3	0	6	6	0
Natural	2	32	1	1	0	1	1	0
Natural	2	35	3	3	0	10	10	0
Natural	2	33	3	3	0	6	6	0
Natural	2	30	1	1	0	1	1	0
Natural	2	31	1	1	0	3	3	0
Natural	2	36	9	9	0	18	18	0
Natural	2	29	1	1	0	1	1	0
Natural	2	34	3	3	0	6	6	0
Natural	2	28	1	1	0	1	1	0
Natural	2	30	2	2	0	5	5	0
Natural	2	31	0	0	0	0	0	0
Natural	2	37	5	5	0	30	30	0
Natural	2	38	6	6	0	30	30	0
Natural	2	30	0	0	0	0	0	0
Natural	2	32	1	1	0	4	4	0
Natural	2	36	4	3	1	16	15	1
Natural	2	32	2	2	0	2	2	0
Natural	2	31	1	1	0	1	1	0
Natural	2	32	0	0	0	0	0	0
Natural	2	33	1	1	0	2	2	0
Natural	2	30	0	0	0	0	0	0
Natural	2	31	0	0	0	0	0	0
Natural	2	32	2	2	0	2	2	0
Natural	2	31	0	0	0	0	0	0
Natural	2	34	1	1	0	3	3	0
Natural	2	36	3	3	0	4	4	0
Natural	2	35	2	2	0	5	5	0
Natural	2	37	8	8	0	28	27	1
Natural	2	34	2	2	0	7	7	0
Natural	2	33	1	1	0	1	1	0
Natural	2	30	0	0	0	0	0	0
Natural	2	32	1	1	0	1	1	0
Natural	2	31	1	1	0	1	1	0
Natural	2	34	3	3	0	4	4	0
Natural	2	32	1	1	0	2	2	0
Natural	2	35	1	1	0	2	2	0
Natural	2	33	1	1	0	2	2	0
Natural	2	34	1	1	0	1	1	0
Natural	2	32	2	2	0	9	9	0
Natural	2	30	1	1	0	3	3	0
Natural	2	31	1	1	0	4	4	0
Natural	2	30	2	1	1	4	3	1
Natural	2	33	1	1	0	3	3	0
Natural	2	34	1	1	0	7	7	0
Natural	2	31	1	1	0	3	3	0
Natural	2	30	0	0	0	0	0	0
Natural	2	33	0	0	0	0	0	0
Natural	2	34	1	1	0	1	1	0
Natural	2	36	5	5	0	21	21	0
Natural	2	35	1	1	0	1	1	0
Natural	2	38	4	4	0	19	19	0
Natural	2	33	1	1	0	1	1	0
Natural	2	36	3	3	0	12	12	0
Natural	2	31	1	1	0	2	2	0
Natural	2	33	1	1	0	4	4	0
Natural	2	35	6	6	0	21	21	0
Natural	2	32	3	3	0	5	5	0
Natural	2	31	1	1	0	1	1	0
Natural	2	30	2	2	0	2	2	0
Natural	2	32	1	1	0	2	2	0
Natural	2	30	1	1	0	1	1	0
Natural	2	33	1	1	0	6	6	0
Natural	2	32	0	0	0	0	0	0
Natural	2	33	3	3	0	4	4	0
Natural	2	36	3	3	0	10	10	0
Trimming	2	30	2	2	0	6	6	0
Trimming	2	32	4	4	0	4	4	0
Trimming	2	28	0	0	0	0	0	0
Trimming	2	34	0	0	0	0	0	0
Trimming	2	29	0	0	0	0	0	0
Trimming	2	28	0	0	0	0	0	0
Trimming	2	38	7	7	0	23	23	0
Trimming	2	36	2	2	0	12	11	1
Trimming	2	40	8	8	0	24	24	0
Trimming	2	35	3	3	0	20	20	0
Trimming	2	37	7	7	0	23	22	1
Trimming	2	29	2	2	0	3	3	0
Trimming	2	32	3	3	0	7	7	0
Trimming	2	30	1	1	0	1	1	0
Trimming	2	29	1	1	0	7	7	0
Trimming	2	30	0	0	0	0	0	0
Trimming	2	31	0	0	0	0	0	0
Trimming	2	28	1	1	0	2	2	0
Trimming	2	30	0	0	0	0	0	0
Trimming	2	35	1	1	0	2	2	0
Trimming	2	38	10	10	0	23	23	0
Trimming	2	34	6	6	0	12	12	0
Trimming	2	36	7	7	0	14	14	0
Trimming	2	37	11	11	0	28	28	0
Trimming	2	36	6	6	0	20	18	2
Trimming	2	35	7	7	0	12	12	0
Trimming	2	30	3	3	0	4	4	0
Trimming	2	34	2	2	0	3	3	0
Trimming	2	36	5	5	0	10	10	0
Trimming	2	33	0	0	0	0	0	0
Trimming	2	31	1	1	0	1	1	0
Trimming	2	30	1	1	0	2	2	0
Trimming	2	30	1	1	0	4	4	0
Trimming	2	32	1	1	0	10	10	0
Trimming	2	33	1	1	0	2	2	0
Trimming	2	30	1	1	0	4	4	0
Trimming	2	32	2	2	0	6	6	0
Trimming	2	33	3	3	0	14	14	0
Trimming	2	30	1	1	0	1	1	0
Trimming	2	38	3	3	0	10	10	0
Trimming	2	37	5	5	0	18	17	1
Trimming	2	38	10	10	0	26	26	0
Trimming	2	33	2	2	0	15	15	0
Trimming	2	31	7	7	0	11	11	0
Trimming	2	30	0	0	0	0	0	0
Trimming	2	31	1	1	0	3	3	0
Trimming	2	35	1	1	0	6	5	1
Trimming	2	32	0	0	0	0	0	0
Trimming	2	31	0	0	0	0	0	0
Trimming	2	30	0	0	0	0	0	0
Trimming	2	32	1	1	0	1	1	0
Trimming	2	33	1	1	0	1	1	0
Trimming	2	34	2	2	0	6	6	0
Trimming	2	32	0	0	0	0	0	0
Trimming	2	33	1	1	0	2	2	0
Trimming	2	31	1	1	0	1	1	0
Trimming	2	34	1	1	0	1	1	0
Trimming	2	36	3	3	0	9	9	0
Trimming	2	34	3	3	0	3	3	0
Trimming	2	32	4	4	0	6	6	0
Trimming	2	35	3	3	0	13	12	1
Trimming	2	33	0	0	0	0	0	0
Trimming	2	30	1	1	0	1	1	0
Trimming	2	31	3	3	0	8	8	0
Trimming	2	36	5	5	0	8	6	2
Trimming	2	29	0	0	0	0	0	0
Trimming	2	34	4	4	0	4	4	0
Trimming	2	28	0	0	0	0	0	0
Trimming	2	30	1	1	0	2	2	0
Trimming	2	31	1	1	0	8	8	0
Trimming	2	37	0	0	0	0	0	0
Trimming	2	38	2	2	0	4	4	0
Trimming	2	30	1	1	0	2	2	0
Trimming	2	32	0	0	0	0	0	0
Trimming	2	36	6	6	0	14	13	1
Trimming	2	32	1	1	0	1	1	0
Trimming	2	31	1	1	0	2	1	1
Trimming	2	32	1	1	0	3	3	0
Trimming	2	33	2	2	0	4	4	0
Trimming	2	30	2	2	0	3	3	0
Trimming	2	31	2	2	0	2	2	0
Trimming	2	32	1	1	0	1	1	0
Trimming	2	31	2	2	0	4	4	0
Trimming	2	34	4	4	0	10	10	0
Trimming	2	36	8	8	0	29	29	0
Trimming	2	35	8	8	0	21	21	0
Trimming	2	37	3	3	0	16	15	1
Trimming	2	34	4	3	1	19	17	2
Trimming	2	33	1	1	0	2	2	0
Trimming	2	30	1	1	0	1	1	0
Trimming	2	32	1	1	0	1	1	0
Trimming	2	31	1	1	0	1	1	0
Trimming	2	34	4	4	0	8	8	0
Trimming	2	32	1	1	0	1	1	0
Trimming	2	35	3	3	0	12	12	0
Trimming	2	33	0	0	0	0	0	0
Trimming	2	34	1	1	0	8	8	0
Trimming	2	32	0	0	0	0	0	0
Trimming	2	30	0	0	0	0	0	0
Trimming	2	31	0	0	0	0	0	0
Trimming	2	30	0	0	0	0	0	0
Trimming	2	33	0	0	0	0	0	0
Trimming	2	34	0	0	0	0	0	0
Trimming	2	31	0	0	0	0	0	0
Trimming	2	30	1	1	0	2	2	0
Trimming	2	33	1	1	0	3	3	0
Trimming	2	34	3	3	0	7	7	0
Trimming	2	36	4	3	1	4	3	1
Trimming	2	35	3	3	0	13	13	0
Trimming	2	38	7	6	1	25	23	2
Trimming	2	33	2	2	0	3	3	0
Trimming	2	36	2	2	0	14	13	1
Trimming	2	31	0	0	0	0	0	0
Trimming	2	33	5	5	0	7	7	0
Trimming	2	35	0	0	0	0	0	0
Trimming	2	32	3	3	0	4	4	0
Trimming	2	31	0	0	0	0	0	0
Trimming	2	30	2	2	0	4	4	0
Trimming	2	32	0	0	0	0	0	0
Trimming	2	30	0	0	0	0	0	0
Trimming	2	33	0	0	0	0	0	0
Trimming	2	32	2	2	0	5	5	0
Trimming	2	33	0	0	0	0	0	0
Trimming	2	36	0	0	0	0	0	0

## Sheet: pollinator swithching mode
trt	femalenumber	malenumber	beenumber	M	F	MM	MF	FM	FF
1	2	30	1	1	0	0	0	0	0
1	2	28	1	0	0	1	0	0	0
1	2	28	1	0	0	1	0	0	0
1	2	29	1	1	0	0	0	0	0
1	2	30	1	1	0	0	0	0	0
1	2	31	1	0	0	1	0	0	0
1	2	30	1	0	0	0	1	0	0
1	2	30	1	1	0	0	0	0	0
1	2	32	1	0	0	1	0	0	0
1	2	30	1	0	0	1	0	0	0
1	2	30	1	0	0	1	0	0	0
1	2	31	1	1	0	0	0	0	0
1	2	32	1	1	0	0	0	0	0
1	2	30	1	1	0	0	0	0	0
1	2	31	1	0	0	1	0	0	0
1	2	29	1	1	0	0	0	0	0
1	2	28	1	1	0	0	0	0	0
1	2	32	1	0	0	1	0	0	0
1	2	31	1	1	0	0	0	0	0
1	2	33	1	0	0	1	0	0	0
1	2	34	1	0	0	1	0	0	0
1	2	33	1	1	0	0	0	0	0
1	2	32	1	1	0	0	0	0	0
1	2	31	1	1	0	0	0	0	0
1	2	32	1	0	0	1	0	0	0
1	2	35	1	0	0	1	0	0	0
1	2	33	1	0	0	1	0	0	0
1	2	34	1	1	0	0	0	0	0
1	2	30	1	0	0	1	0	0	0
1	2	31	1	0	0	1	0	0	0
1	2	33	1	0	0	1	0	0	0
1	2	34	1	0	0	1	0	0	0
1	2	31	1	0	0	1	0	0	0
1	2	34	1	1	0	0	0	0	0
1	2	35	1	1	0	0	0	0	0
1	2	33	1	1	0	0	0	0	0
1	2	31	1	0	0	1	0	0	0
1	2	33	1	0	0	1	0	0	0
1	2	31	1	1	0	0	0	0	0
1	2	32	1	0	0	1	0	0	0
1	2	30	1	1	0	0	0	0	0
1	2	33	1	0	0	1	0	0	0
1	2	29	2	0	0	2	0	0	0
1	2	33	2	0	0	2	0	0	0
1	2	33	2	1	1	0	0	0	0
1	2	33	2	2	0	0	0	0	0
1	2	30	2	1	0	1	0	0	0
1	2	31	2	0	0	2	0	0	0
1	2	31	2	1	0	1	0	0	0
1	2	34	2	1	0	1	0	0	0
1	2	32	2	2	0	0	0	0	0
1	2	33	2	2	0	0	0	0	0
1	2	34	2	1	0	1	0	0	0
1	2	30	2	0	0	2	0	0	0
1	2	32	2	2	0	0	0	0	0
1	2	32	2	2	0	0	0	0	0
1	2	35	2	0	0	2	0	0	0
1	2	34	2	0	0	2	0	0	0
1	2	32	2	1	0	1	0	0	0
1	2	30	2	0	1	1	0	0	0
1	2	30	2	2	0	0	0	0	0
1	2	36	3	1	0	2	0	0	0
1	2	35	3	0	1	2	0	0	0
1	2	30	3	0	0	3	0	0	0
1	2	35	3	0	0	3	0	0	0
1	2	30	3	2	0	1	0	0	0
1	2	33	3	0	1	2	0	0	0
1	2	34	3	1	0	2	0	0	0
1	2	35	3	2	0	1	0	0	0
1	2	33	3	1	0	2	0	0	0
1	2	34	3	2	0	1	0	0	0
1	2	36	3	2	0	1	0	0	0
1	2	34	3	2	0	1	0	0	0
1	2	36	3	0	0	3	0	0	0
1	2	32	3	2	0	1	0	0	0
1	2	33	3	1	0	2	0	0	0
1	2	36	3	0	0	3	0	0	0
1	2	37	4	1	0	3	0	0	0
1	2	38	4	1	0	3	0	0	0
1	2	32	4	3	0	1	0	0	0
1	2	36	4	2	0	2	0	0	0
1	2	36	4	0	0	3	0	1	0
1	2	38	4	1	0	3	0	0	0
1	2	32	5	3	0	2	0	0	0
1	2	38	5	1	0	4	0	0	0
1	2	32	5	3	1	1	0	0	0
1	2	34	5	1	0	4	0	0	0
1	2	38	5	1	0	4	0	0	0
1	2	37	5	1	0	4	0	0	0
1	2	31	5	2	0	3	0	0	0
1	2	37	5	1	0	4	0	0	0
1	2	36	5	1	0	4	0	0	0
1	2	34	6	1	0	5	0	0	0
1	2	38	6	4	0	2	0	0	0
1	2	38	6	0	0	6	0	0	0
1	2	35	6	1	0	5	0	0	0
1	2	34	7	1	0	6	0	0	0
1	2	35	7	2	0	5	0	0	0
1	2	35	7	4	0	3	0	0	0
1	2	40	8	3	0	5	0	0	0
1	2	36	8	5	0	2	1	0	0
1	2	37	8	2	0	5	1	0	0
1	2	36	9	4	0	5	0	0	0
1	2	36	9	4	0	5	0	0	0
1	2	37	10	3	0	7	0	0	0
1	2	36	10	2	0	8	0	0	0
2	2	30	1	1	0	0	0	0	0
2	2	29	1	0	0	1	0	0	0
2	2	28	1	0	0	1	0	0	0
2	2	35	1	0	0	1	0	0	0
2	2	31	1	1	0	0	0	0	0
2	2	30	1	0	0	1	0	0	0
2	2	30	1	0	0	1	0	0	0
2	2	32	1	0	0	1	0	0	0
2	2	33	1	0	0	1	0	0	0
2	2	30	1	0	0	1	0	0	0
2	2	30	1	1	0	0	0	0	0
2	2	31	1	0	0	1	0	0	0
2	2	35	1	0	0	0	1	0	0
2	2	32	1	1	0	0	0	0	0
2	2	33	1	1	0	0	0	0	0
2	2	33	1	0	0	1	0	0	0
2	2	31	1	1	0	0	0	0	0
2	2	34	1	1	0	0	0	0	0
2	2	30	1	1	0	0	0	0	0
2	2	30	1	0	0	1	0	0	0
2	2	31	1	0	0	1	0	0	0
2	2	30	1	0	0	1	0	0	0
2	2	32	1	1	0	0	0	0	0
2	2	31	1	0	0	0	1	0	0
2	2	32	1	0	0	1	0	0	0
2	2	32	1	1	0	0	0	0	0
2	2	33	1	0	0	1	0	0	0
2	2	30	1	1	0	0	0	0	0
2	2	32	1	1	0	0	0	0	0
2	2	31	1	1	0	0	0	0	0
2	2	32	1	1	0	0	0	0	0
2	2	34	1	0	0	1	0	0	0
2	2	30	1	0	0	1	0	0	0
2	2	33	1	0	0	1	0	0	0
2	2	30	2	1	0	1	0	0	0
2	2	36	2	0	0	1	1	0	0
2	2	29	2	1	0	1	0	0	0
2	2	34	2	1	0	1	0	0	0
2	2	32	2	0	0	2	0	0	0
2	2	33	2	0	0	2	0	0	0
2	2	34	2	0	0	2	0	0	0
2	2	38	2	1	0	1	0	0	0
2	2	33	2	1	0	1	0	0	0
2	2	30	2	1	0	1	0	0	0
2	2	31	2	2	0	0	0	0	0
2	2	31	2	1	0	1	0	0	0
2	2	33	2	1	0	1	0	0	0
2	2	36	2	0	0	1	1	0	0
2	2	30	2	0	0	2	0	0	0
2	2	32	2	0	0	2	0	0	0
2	2	35	3	1	0	2	0	0	0
2	2	32	3	1	0	2	0	0	0
2	2	30	3	2	0	1	0	0	0
2	2	33	3	1	0	2	0	0	0
2	2	38	3	1	0	2	0	0	0
2	2	36	3	0	0	3	0	0	0
2	2	34	3	3	0	0	0	0	0
2	2	35	3	0	0	2	1	0	0
2	2	31	3	2	0	1	0	0	0
2	2	37	3	0	0	2	1	0	0
2	2	35	3	0	0	3	0	0	0
2	2	34	3	0	0	3	0	0	0
2	2	35	3	0	0	3	0	0	0
2	2	32	3	2	0	1	0	0	0
2	2	32	4	4	0	0	0	0	0
2	2	32	4	3	0	1	0	0	0
2	2	34	4	4	0	0	0	0	0
2	2	34	4	0	0	4	0	0	0
2	2	34	4	0	1	2	1	0	0
2	2	34	4	2	0	2	0	0	0
2	2	36	4	3	1	0	0	0	0
2	2	36	5	3	0	2	0	0	0
2	2	37	5	1	0	3	1	0	0
2	2	36	5	2	0	1	2	0	0
2	2	33	5	3	0	2	0	0	0
2	2	34	6	2	0	4	0	0	0
2	2	36	6	1	0	3	2	0	0
2	2	36	6	2	0	3	1	0	0
2	2	38	7	4	0	3	0	0	0
2	2	37	7	3	0	3	1	0	0
2	2	36	7	3	0	4	0	0	0
2	2	35	7	4	0	3	0	0	0
2	2	31	7	4	0	3	0	0	0
2	2	38	7	0	1	5	1	0	0
2	2	40	8	1	0	7	0	0	0
2	2	36	8	4	0	4	0	0	0
2	2	35	8	3	0	5	0	0	0
2	2	38	10	6	0	4	0	0	0
2	2	38	10	3	0	7	0	0	0
2	2	37	11	4	0	7	0	0	0

## Sheet: self-interference
population	treatment	flower number	carpel number	fruit number per flower	fruit number per carpel	dry weight
CZ1	SP-SP	2	15	0	0	0
CZ1	CP-CP	2	8	1	1	23.14
CZ1	SP-CP	2	9	0	0	0
CZ1	CP-SP	2	16	1	1	35.84
CZ1	MP-MP	2	10	0	0	0
CZ1	SP-SP	2	9	0	0	0
CZ1	CP-CP	2	10	2	2	20.37
CZ1	SP-CP	2	7	0	0	0
CZ1	CP-SP	2	9	1	2	26.19
CZ1	MP-MP	2	13	0	0	0
CZ1	SP-SP	2	13	0	0	0
CZ1	CP-CP	2	12	2	2	20.35
CZ1	SP-CP	2	16	0	0	0
CZ1	CP-SP	2	13	1	2	19.45
CZ1	MP-MP	2	11	0	0	0
CZ1	SP-SP	2	13	0	0	0
CZ1	CP-CP	2	12	1	2	36.19
CZ1	SP-CP	2	12	0	0	0
CZ1	CP-SP	2	16	1	1	29.15
CZ1	MP-MP	2	15	0	0	0
CZ1	SP-SP	2	19	0	0	0
CZ1	CP-CP	2	19	1	1	42.02
CZ1	SP-CP	2	12	0	0	0
CZ1	CP-SP	2	13	0	0	0
CZ1	MP-MP	2	12	2	2	19.97
CZ1	SP-SP	2	20	0	0	0
CZ1	CP-CP	2	12	2	3	15.22
CZ1	SP-CP	2	19	0	0	0
CZ1	CP-SP	2	11	1	3	12.41
CZ1	MP-MP	2	11	1	1	11.43
CZ1	SP-SP	2	16	0	0	0
CZ1	CP-CP	2	11	2	2	15.62
CZ1	SP-CP	2	17	2	4	16.2
CZ1	CP-SP	2	16	1	1	21.47
CZ1	MP-MP	2	20	1	1	14.49
CZ1	SP-SP	2	12	0	0	0
CZ1	CP-CP	2	16	1	2	25.89
CZ1	SP-CP	2	12	0	0	0
CZ1	CP-SP	2	12	1	1	39.98
CZ1	MP-MP	2	13	1	1	41.64
CZ1	SP-SP	2	15	0	0	0
CZ1	CP-CP	2	15	2	4	33.37
CZ1	SP-CP	2	12	0	0	0
CZ1	CP-SP	2	12	1	1	29.52
CZ1	MP-MP	2	12	0	0	0
CZ1	SP-SP	2	15	0	0	0
CZ1	CP-CP	2	11	1	2	102.6
CZ1	SP-CP	2	18	0	0	0
CZ1	CP-SP	2	14	1	4	18.51
CZ1	MP-MP	2	12	1	1	25.15
CZ1	SP-SP	2	11	0	0	0
CZ1	CP-CP	2	14	1	2	17.33
CZ1	SP-CP	2	10	0	0	0
CZ1	CP-SP	2	12	0	0	0
CZ1	MP-MP	2	14	0	0	0
CZ1	SP-SP	2	13	0	0	0
CZ1	CP-CP	2	12	2	3	12.99
CZ1	SP-CP	2	13	0	0	0
CZ1	CP-SP	2	14	2	2	19.56
CZ1	MP-MP	2	14	0	0	0
CZ1	SP-SP	2	10	0	0	0
CZ1	CP-CP	2	13	1	1	8.76
CZ1	SP-CP	2	12	0	0	0
CZ1	CP-SP	2	11	1	1	42.46
CZ1	MP-MP	2	8	1	2	10.26
CZ1	SP-SP	2	6	0	0	0
CZ1	CP-CP	2	15	2	3	16.29
CZ1	SP-CP	2	14	0	0	0
CZ1	CP-SP	2	14	1	1	15.51
CZ1	MP-MP	2	13	0	0	0
CZ1	SP-SP	2	11	0	0	0
CZ1	CP-CP	2	9	1	2	22.56
CZ1	SP-CP	2	10	0	0	0
CZ1	CP-SP	2	14	2	3	39.12
CZ1	MP-MP	2	10	0	0	0
CZ1	SP-SP	2	11	0	0	0
CZ1	CP-CP	2	12	1	1	47.53
CZ1	SP-CP	2	12	0	0	0
CZ1	CP-SP	2	12	2	2	26.66
CZ1	MP-MP	2	14	0	0	0
CZ1	SP-SP	2	16	0	0	0
CZ1	CP-CP	2	12	1	1	22.55
CZ1	SP-CP	2	13	0	0	0
CZ1	CP-SP	2	14	1	1	17.55
CZ1	MP-MP	2	7	1	1	40.62
CZ1	SP-SP	2	12	0	0	0
CZ1	CP-CP	2	10	1	1	9.04
CZ1	SP-CP	2	12	0	0	0
CZ1	CP-SP	2	12	2	5	24.85
CZ1	MP-MP	2	14	1	1	21.33
CZ1	SP-SP	2	14	0	0	0
CZ1	CP-CP	2	11	2	4	29.34
CZ1	SP-CP	2	17	0	0	0
CZ1	CP-SP	2	14	1	5	32.2
CZ1	MP-MP	2	12	0	0	0
CZ1	SP-SP	2	14	0	0	0
CZ1	CP-CP	2	14	1	1	29.59
CZ1	SP-CP	2	15	1	1	22.12
CZ1	CP-SP	2	13	0	0	0
CZ1	MP-MP	2	16	1	2	43.01
CZ1	SP-SP	2	12	0	0	0
CZ1	CP-CP	2	15	1	2	58.77
CZ1	SP-CP	2	18	0	0	0
CZ1	CP-SP	2	19	0	0	0
CZ1	MP-MP	2	13	1	1	34.74
CZ1	SP-SP	2	11	0	0	0
CZ1	CP-CP	2	16	1	2	30.23
CZ1	SP-CP	2	15	0	0	0
CZ1	CP-SP	2	15	1	1	30.1
CZ1	MP-MP	2	17	0	0	0
CZ1	SP-SP	2	13	0	0	0
CZ1	CP-CP	2	12	1	3	12.29
CZ1	SP-CP	2	12	1	1	25.09
CZ1	CP-SP	2	13	1	1	21.94
CZ1	MP-MP	2	14	0	0	0
CZ1	SP-SP	2	11	0	0	0
CZ1	CP-CP	2	10	1	1	35.48
CZ1	SP-CP	2	13	0	0	0
CZ1	CP-SP	2	12	0	0	0
CZ1	MP-MP	2	12	1	1	29.64
CZ1	SP-SP	2	10	0	0	0
CZ1	CP-CP	2	13	1	1	29.8
CZ1	SP-CP	2	11	1	1	32.76
CZ1	CP-SP	2	6	1	4	23.54
CZ1	MP-MP	2	14	0	0	0
CZ1	SP-SP	2	15	0	0	0
CZ1	CP-CP	2	12	1	4	16.64
CZ1	SP-CP	2	9	0	0	0
CZ1	CP-SP	2	10	1	2	10.6
CZ1	MP-MP	2	9	2	3	12.11
CZ1	SP-SP	2	15	0	0	0
CZ1	CP-CP	2	8	1	1	21.45
CZ1	SP-CP	2	11	0	0	0
CZ1	CP-SP	2	13	1	1	21.37
CZ1	MP-MP	2	12	0	0	0
CZ1	SP-SP	2	12	0	0	0
CZ1	CP-CP	2	14	1	1	54.22
CZ1	SP-CP	2	13	0	0	0
CZ1	CP-SP	2	12	1	1	35.16
CZ1	MP-MP	2	14	0	0	0
CZ1	SP-SP	2	18	0	0	0
CZ1	CP-CP	2	14	1	1	60.36
CZ1	SP-CP	2	15	0	0	0
CZ1	CP-SP	2	14	1	1	21.29
CZ1	MP-MP	2	16	0	0	0
CZ1	SP-SP	2	17	0	0	0
CZ1	CP-CP	2	12	1	1	56.66
CZ1	SP-CP	2	14	0	0	0
CZ1	CP-SP	2	14	1	1	15.65
CZ1	MP-MP	2	15	1	1	18.09
CZ1	SP-SP	2	13	0	0	0
CZ1	CP-CP	2	12	1	2	18.38
CZ1	SP-CP	2	12	0	0	0
CZ1	CP-SP	2	14	0	0	0
CZ1	MP-MP	2	12	0	0	0
CZ1	SP-SP	2	15	0	0	0
CZ1	CP-CP	2	15	1	1	34.21
CZ1	SP-CP	2	21	0	0	0
CZ1	CP-SP	2	19	2	7	17.8
CZ1	MP-MP	2	14	0	0	0
CZ1	SP-SP	2	12	0	0	0
CZ1	CP-CP	2	11	0	0	0
CZ1	SP-CP	2	9	0	0	0
CZ1	CP-SP	2	10	1	1	60.26
CZ1	MP-MP	2	12	0	0	0
CZ1	SP-SP	2	10	0	0	0
CZ2	CP-CP	2	12	0	0	0
CZ2	SP-CP	2	11	0	0	0
CZ2	CP-SP	2	12	0	0	0
CZ2	MP-MP	2	13	0	0	0
CZ2	SP-SP	2	10	0	0	0
CZ2	CP-CP	2	11	0	0	0
CZ2	SP-CP	2	10	0	0	0
CZ2	CP-SP	2	12	2	9	17.05
CZ2	MP-MP	2	11	0	0	0
CZ2	SP-SP	2	14	0	0	0
CZ2	CP-CP	2	11	1	2	22.77
CZ2	SP-CP	2	12	1	1	41.21
CZ2	CP-SP	2	8	1	2	33.12
CZ2	MP-MP	2	11	1	1	18.8
CZ2	SP-SP	2	14	0	0	0
CZ2	CP-CP	2	14	1	1	23.62
CZ2	SP-CP	2	12	0	0	0
CZ2	CP-SP	2	15	1	1	30.08
CZ2	MP-MP	2	13	1	1	22.16
CZ2	SP-SP	2	13	0	0	0
CZ2	CP-CP	2	13	2	2	22.64
CZ2	SP-CP	2	14	0	0	0
CZ2	CP-SP	2	15	1	3	21.69
CZ2	MP-MP	2	12	1	1	22.72
CZ2	SP-SP	2	11	0	0	0
CZ2	CP-CP	2	12	0	0	0
CZ2	SP-CP	2	10	0	0	0
CZ2	CP-SP	2	12	1	4	32.76
CZ2	MP-MP	2	12	0	0	0
CZ2	SP-SP	2	11	0	0	0
CZ2	CP-CP	2	10	2	2	39.06
CZ2	SP-CP	2	11	0	0	0
CZ2	CP-SP	2	11	1	1	24.54
CZ2	MP-MP	2	12	0	0	0
CZ2	SP-SP	2	14	0	0	0
CZ2	CP-CP	2	14	1	1	51
CZ2	SP-CP	2	13	0	0	0
CZ2	CP-SP	2	16	1	1	20.91
CZ2	MP-MP	2	13	1	1	59.38
CZ2	SP-SP	2	12	0	0	0
CZ2	CP-CP	2	12	1	1	34.33
CZ2	SP-CP	2	11	0	0	0
CZ2	CP-SP	2	11	2	3	37.98
CZ2	MP-MP	2	12	0	0	0
CZ2	SP-SP	2	13	0	0	0
CZ2	CP-CP	2	11	1	2	44.56
CZ2	SP-CP	2	11	0	0	0
CZ2	CP-SP	2	12	1	2	38.91
CZ2	MP-MP	2	12	1	1	46.85
CZ2	SP-SP	2	12	0	0	0
CZ2	CP-CP	2	12	1	2	23.14
CZ2	SP-CP	2	10	0	0	0
CZ2	CP-SP	2	10	0	0	0
CZ2	MP-MP	2	11	0	0	0
CZ2	SP-SP	2	9	0	0	0
CZ2	CP-CP	2	8	1	1	16.41
CZ2	SP-CP	2	9	0	0	0
CZ2	CP-SP	2	8	1	1	46.36
CZ2	MP-MP	2	6	0	0	0
CZ2	SP-SP	2	10	0	0	0
CZ2	CP-CP	2	8	2	5	33.25
CZ2	SP-CP	2	7	0	0	0
CZ2	CP-SP	2	10	1	1	33.89
CZ2	MP-MP	2	8	2	2	46.34
CZ2	SP-SP	2	8	0	0	0
CZ2	CP-CP	2	7	0	0	0
CZ2	SP-CP	2	6	0	0	0
CZ2	CP-SP	2	6	0	0	0
CZ2	MP-MP	2	8	0	0	0
CZ2	SP-SP	2	7	0	0	0
CZ2	CP-CP	2	7	0	0	0
CZ2	SP-CP	2	8	0	0	0
CZ2	CP-SP	2	8	0	0	0
CZ2	MP-MP	2	8	0	0	0
CZ2	SP-SP	2	2	0	0	0
CZ2	CP-CP	2	7	2	2	31.52
CZ2	SP-CP	2	7	0	0	0
CZ2	CP-SP	2	14	2	2	33.46
CZ2	MP-MP	2	4	2	2	32.72
CZ2	SP-SP	2	8	0	0	0
CZ2	CP-CP	2	3	0	0	0
CZ2	SP-CP	2	8	0	0	0
CZ2	CP-SP	2	9	2	2	40.06
CZ2	MP-MP	2	8	0	0	0
CZ2	SP-SP	2	10	0	0	0
CZ2	CP-CP	2	9	0	0	0
CZ2	SP-CP	2	11	0	0	0
CZ2	CP-SP	2	9	0	0	0
CZ2	MP-MP	2	10	0	0	0
CZ2	SP-SP	2	10	0	0	0
CZ2	CP-CP	2	9	0	0	0
CZ2	SP-CP	2	2	0	0	0
CZ2	CP-SP	2	8	0	0	0
CZ2	MP-MP	2	10	0	0	0
CZ2	SP-SP	2	9	0	0	0
CZ2	CP-CP	2	12	1	1	23.64
CZ2	SP-CP	2	12	0	0	0
CZ2	CP-SP	2	11	1	1	28.73
CZ2	MP-MP	2	11	0	0	0
CZ2	SP-SP	2	10	0	0	0
CZ2	CP-CP	2	9	1	2	18.18
CZ2	SP-CP	2	11	0	0	0
CZ2	CP-SP	2	12	0	0	0
CZ2	MP-MP	2	11	1	1	8.67
CZ2	SP-SP	2	13	0	0	0
CZ2	CP-CP	2	12	2	3	21.74
CZ2	SP-CP	2	14	0	0	0
CZ2	CP-SP	2	12	1	1	24.8
CZ2	MP-MP	2	12	1	1	30.24
CZ2	SP-SP	2	9	0	0	0
CZ2	CP-CP	2	16	1	3	22.57
CZ2	SP-CP	2	13	1	1	102.54
CZ2	CP-SP	2	15	1	2	52.02
CZ2	MP-MP	2	16	2	3	23.32
CZ2	SP-SP	2	14	0	0	0
CZ2	CP-CP	2	20	1	1	43.64
CZ2	SP-CP	2	15	0	0	0
CZ2	CP-SP	2	15	0	0	0
CZ2	MP-MP	2	12	0	0	0
CZ2	SP-SP	2	11	0	0	0
CZ2	CP-CP	2	11	1	1	21.82
CZ2	SP-CP	2	11	0	0	0
CZ2	CP-SP	2	15	1	1	29.6
CZ2	MP-MP	2	11	1	1	20.24
CZ2	SP-SP	2	11	0	0	0
CZ2	CP-CP	2	10	1	1	30.22
CZ2	SP-CP	2	10	0	0	0
CZ2	CP-SP	2	13	1	1	23.66
CZ2	MP-MP	2	12	1	1	10.28
CZ2	SP-SP	2	12	0	0	0
CZ2	CP-CP	2	13	1	1	47.89
CZ2	SP-CP	2	12	0	0	0
CZ2	CP-SP	2	12	1	1	45.55
CZ2	MP-MP	2	15	0	0	0
CZ2	SP-SP	2	17	0	0	0
CZ2	CP-CP	2	10	1	1	62.26
CZ2	SP-CP	2	18	0	0	0
CZ2	CP-SP	2	18	0	0	0
CZ2	MP-MP	2	10	1	1	38.46
CZ2	SP-SP	2	14	0	0	0
CZ2	CP-CP	2	14	1	1	51.82
CZ2	SP-CP	2	13	0	0	0
CZ2	CP-SP	2	13	0	0	0
CZ2	MP-MP	2	11	0	0	0
CZ2	SP-SP	2	17	0	0	0
CZ2	CP-CP	2	9	1	2	42.59
CZ2	SP-CP	2	19	0	0	0
CZ2	CP-SP	2	17	1	1	21.97
CZ2	MP-MP	2	16	1	1	37.07
CZ2	SP-SP	2	11	0	0	0
CZ2	CP-CP	2	13	1	1	63.51
CZ2	SP-CP	2	13	0	0	0
CZ2	CP-SP	2	12	1	1	43.47
CZ2	MP-MP	2	12	0	0	0
CZ2	SP-SP	2	13	0	0	0
CZ2	CP-CP	2	12	1	2	42.41
CZ2	SP-CP	2	13	1	2	40.06
CZ2	CP-SP	2	12	1	1	28.52
CZ2	MP-MP	2	13	0	0	0
CZ2	SP-SP	2	10	0	0	0
CZ2	CP-CP	2	14	1	2	43.22
CZ2	SP-CP	2	8	0	0	0
CZ2	CP-SP	2	14	1	1	70.84
CZ2	MP-MP	2	10	0	0	0
